# Supplementary material for: Effects of the Bradyrhizobium japonicum waaL (rfaL) Gene on Hydrophobicity, Motility, Stress Tolerance, and Symbiotic Relationship with Soybeans
Source: Int J Mol Sci. 2015 Jul 23;16(8):16778–91. doi: 10.3390/ijms160816778 (PMC4581169; doi:10.3390/ijms160816778)
Supplement: Supplementary file 1 [file ijms-16-16778-s001.pdf]

## Supplementary Information

**Wild type (61A101C)**

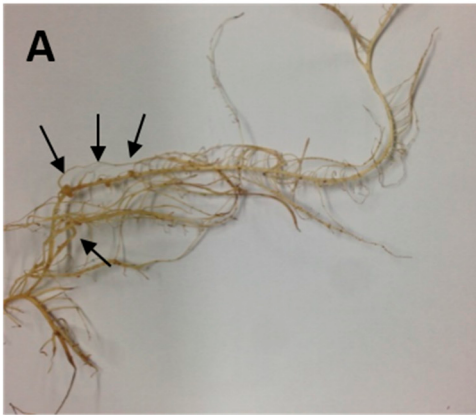

**Mutant (JS015)**

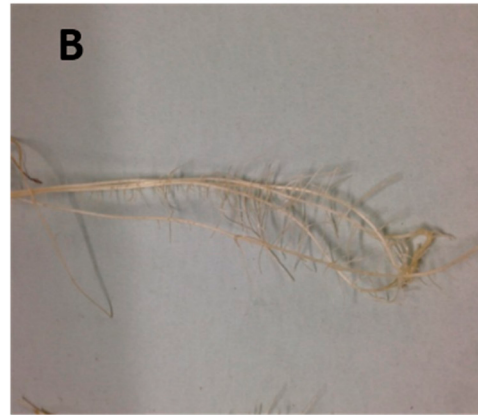

**Figure S1.** Representative images of soybean roots inoculated with either the wild type (A) or JS015 (B). Plants were harvested after 4 weeks of growth. Arrows indicate nodules formed on soybean roots. Note that there is no nodule formed on roots with JS015 as shown in (B).
